# Supplementary material for: Electron transfer within a reaction path model calibrated by constrained DFT calculations: application to mixed-valence organic compounds
Source: Royal Society of Chemistry journal article supplement (doi:10.1039/c5cp01194a), 2015-01-01
Supplement: c5cp01194a4.pdf [file c5cp01194a4.pdf]

## Supplementary data

### Electron transfer within a reaction path model calibrated by constrained DFT calculations : Application to mixed-valence organic compounds.

E. Mangaud,<sup>a,b</sup> A. de la Lande,<sup>b</sup> C. Meier<sup>a</sup> and M. Desouter-Lecomte<sup>b,c</sup>

<sup>a</sup> *Laboratoire Collisions Agrégats Réactivité, UMR 5589, IRSAMC, Université Toulouse III Paul Sabatier, Bât.3R1b4, 118 route de Narbonne, F-31062, Toulouse, France,* <sup>b</sup> *Laboratoire de Chimie Physique, UMR 8000, Université Paris-Sud, Bât. 349, 15 avenue Jean Perrin, F-91405 Orsay, France,* <sup>c</sup> *Département de Chimie, Université de Liège, Sart Tilman, B6, B-4000 Liège, Belgium*

#### 1. Geometries

The root mean square of the distances (RMSD) is calculated with all bonds denoted on Fig. 1 (for which experimental data are available) for both donor and acceptor cycles. Geometries of each DMP<sub>n</sub> are provided in separate \*.xyz files.

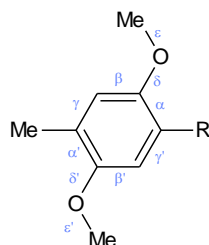

**Fig. 1** Numbering of the bond lengths

#### 2. Influence of exchange-correlation functional

On the following table, we summarize the RMSD of the equilibrium geometries obtained by different exchange-correlation functionals as indicated.

**Table 1.** Choice of exchange-correlation functional - RMSD (Root mean square of bond distances) in DMP cycles between experimental and cDFT or DFT results for DMP<sub>n</sub> (n = 0,1,2)

| RMSD             | cDFT     |           | DFT      |       | DFT   | DFT    |
|------------------|----------|-----------|----------|-------|-------|--------|
|                  | OPTX-PBE | PBE98-LYP | OPTX-PBE | B3LYP | M06HF | ωB97XD |
| DMP <sub>0</sub> | 0.022    | 0.027     | 0.013    | 0.010 | 0.027 | 0.015  |
| DMP <sub>1</sub> | 0.011    | 0.022     | 0.012    | 0.011 | 0.016 | 0.014  |
| DMP <sub>2</sub> | 0.009    | 0.019     | 0.019    | 0.018 | 0.013 | 0.013  |

#### 3. Effect of including diffuse functions

Several calculations have been performed to assess the influence of including diffuse functions. This can be seen on Tab. 2. We found a negligible effect.

**Table 2.** Influence of diffuse functions - RMSD (Root mean square of bond distances) in DMP cycles between 6-311g\*\* basis set and 6-311++g\*\* DFT results for DMP\_n (n = 0,1,2) (XC functional :  $\omega$ B97XD)

| RMSD             | 6-311g** vs 6-311++g** |
|------------------|------------------------|
| DMP <sub>0</sub> | 0.0005                 |
| DMP <sub>1</sub> | 0.003                  |
| DMP <sub>2</sub> | 0.001                  |

#### 4. Effect of dispersion correction

In the case of cDFT calculations, we present here the effect of dispersion correction for a selected exchange-correlation functional (PBE98-LYP). As above, we found a negligible contribution.

**Table 3.** Influence of dispersion corrections - RMSD (Root mean square of bond distances) in DMP cycles between cDFT calculations with or without dispersion corrections for DMP\_n (n = 0,1,2) (XC functional : PBE98-LYP)

| RMSD             | Dispersion correction |
|------------------|-----------------------|
| DMP <sub>0</sub> | 0.0007                |
| DMP <sub>1</sub> | 0.0007                |
| DMP <sub>2</sub> | 0.0009                |
